# Supplementary material for: Effect of Salivary Exosomal miR-25-3p on Periodontitis With Insulin Resistance
Source: PubMed Central journal article supplement (PMC8777127; doi:10.3389/fimmu.2021.775046), 2022-01-07

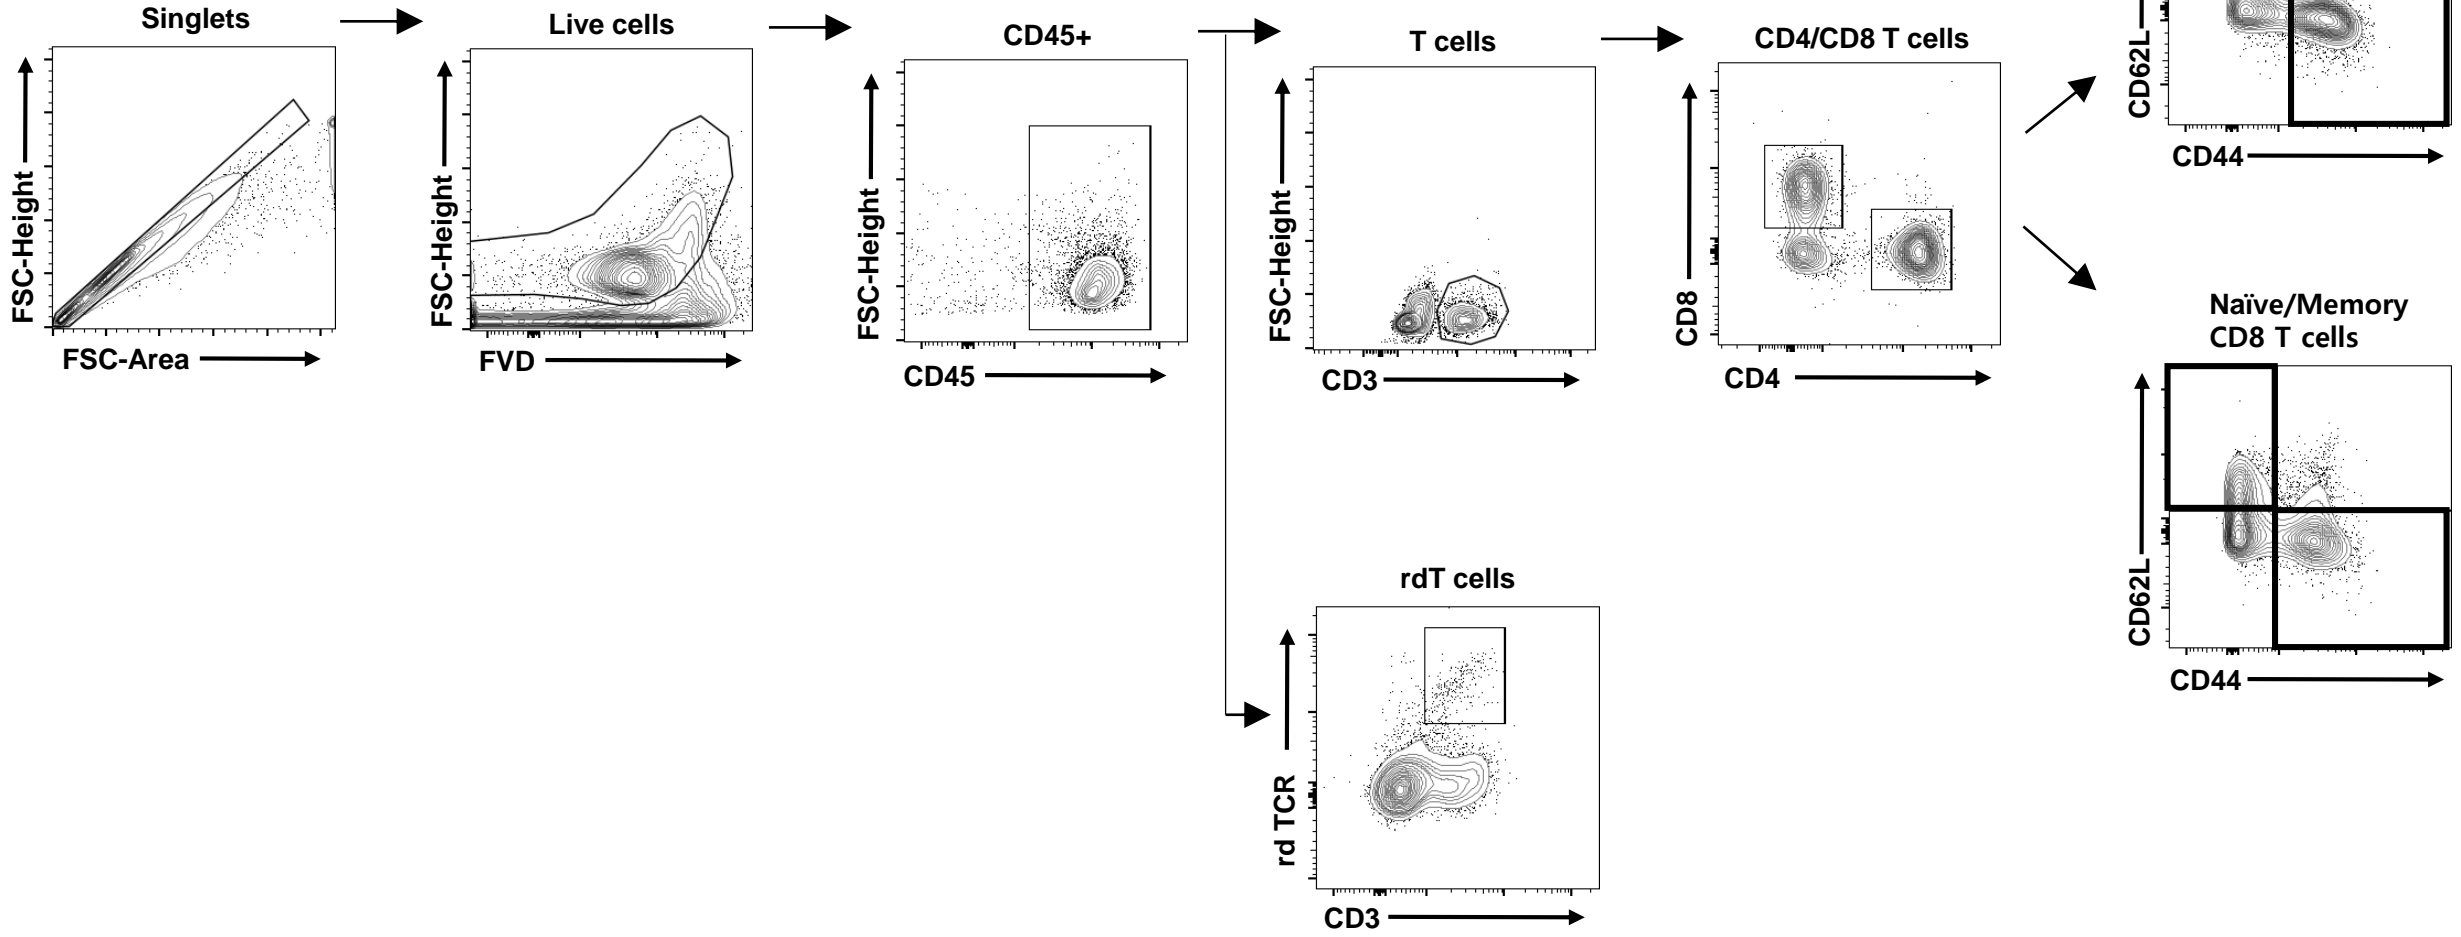

A

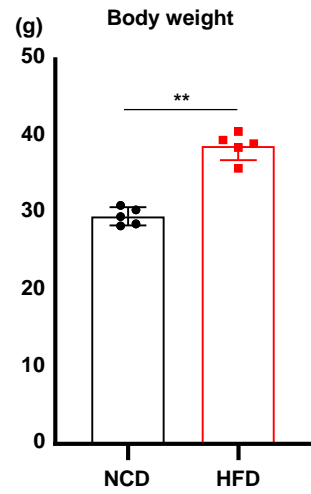

B

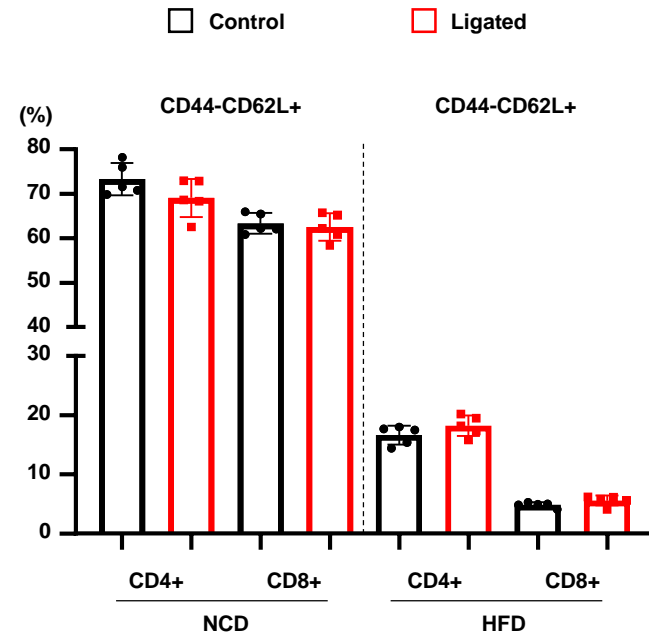

C

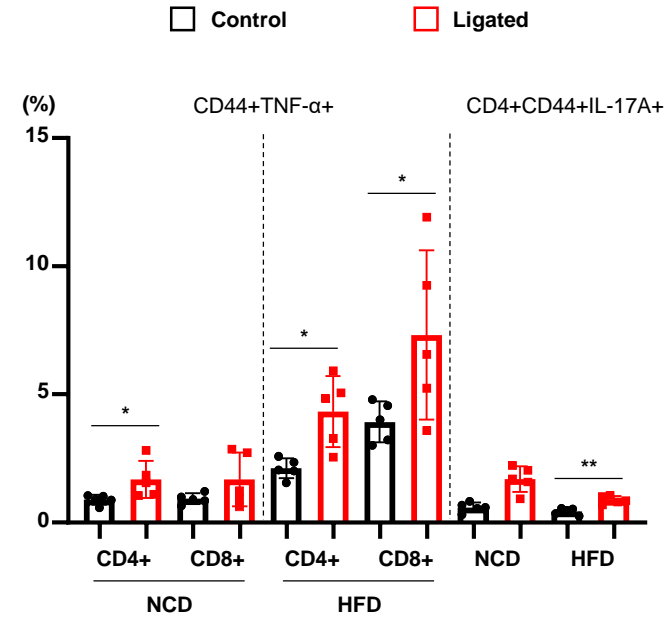

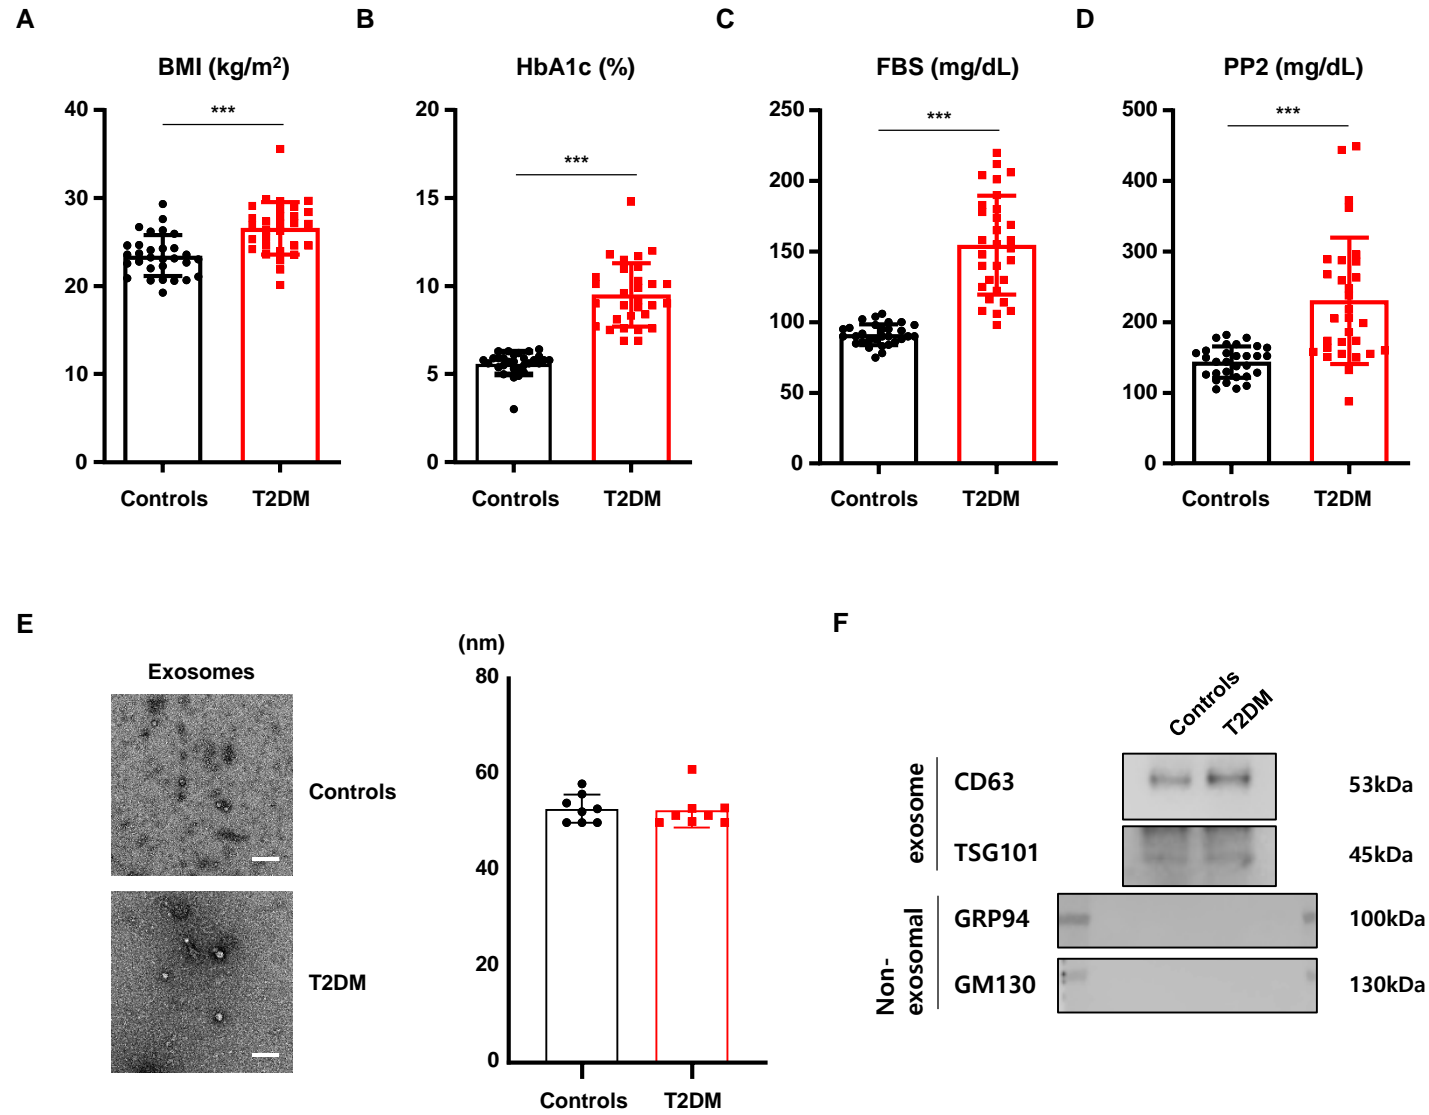

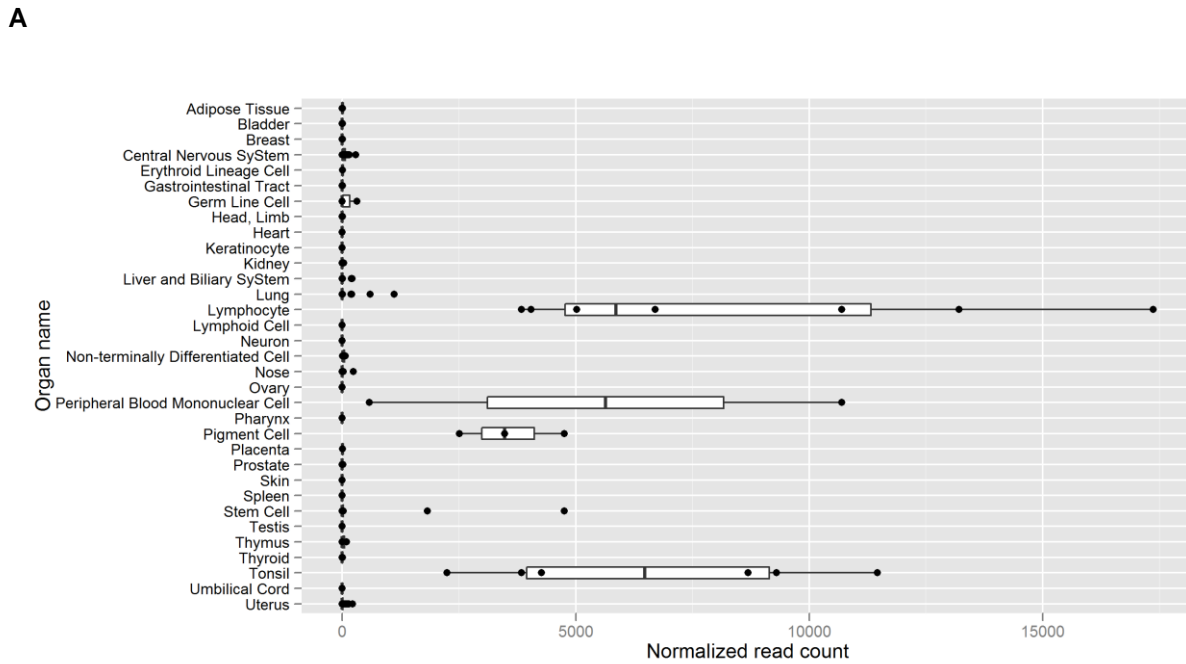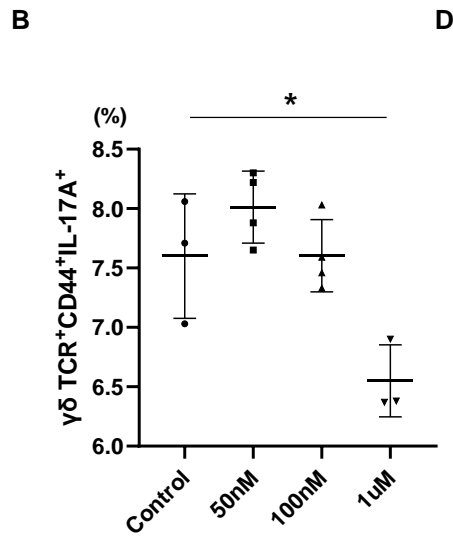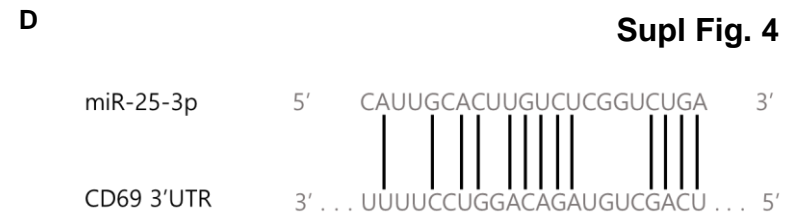

**C**

| Target Rank | Target Score | miRNA Name    | Gene Symbol | Gene Description                                          |
|-------------|--------------|---------------|-------------|-----------------------------------------------------------|
| 1           | 100          | hsa-miR-25-3p | CD69        | CD69 molecule                                             |
| 2           | 100          | hsa-miR-25-3p | SLC12A5     | solute carrier family 12 member 5                         |
| 3           | 100          | hsa-miR-25-3p | MAN2A1      | mannosidase alpha class 2A member 1                       |
| 4           | 100          | hsa-miR-25-3p | G3BP2       | G3BP stress granule assembly factor 2                     |
| 5           | 100          | hsa-miR-25-3p | FBXW7       | F-box and WD repeat domain containing 7                   |
| 6           | 99           | hsa-miR-25-3p | PIKFYVE     | phosphoinositide kinase, FYVE-type zinc finger containing |
| 7           | 99           | hsa-miR-25-3p | MAP2K4      | mitogen-activated protein kinase kinase 4                 |
| 8           | 99           | hsa-miR-25-3p | B3GALT2     | beta-1,3-galactosyltransferase 2                          |
| 9           | 99           | hsa-miR-25-3p | FNIP1       | folliculin interacting protein 1                          |
| 10          | 99           | hsa-miR-25-3p | SLC17A6     | solute carrier family 17 member 6                         |

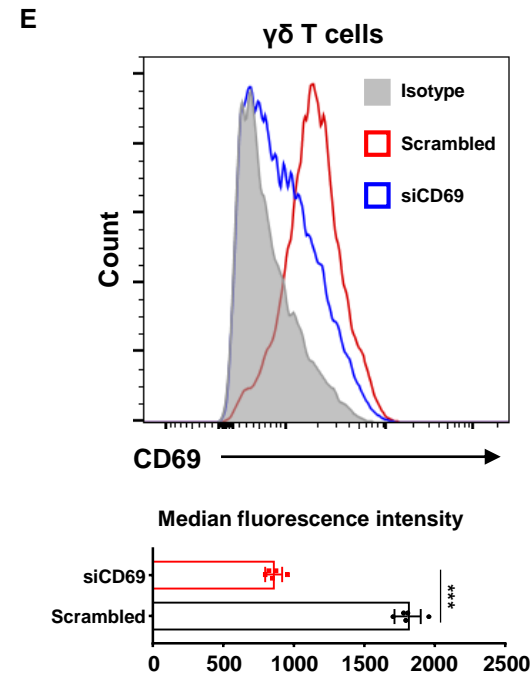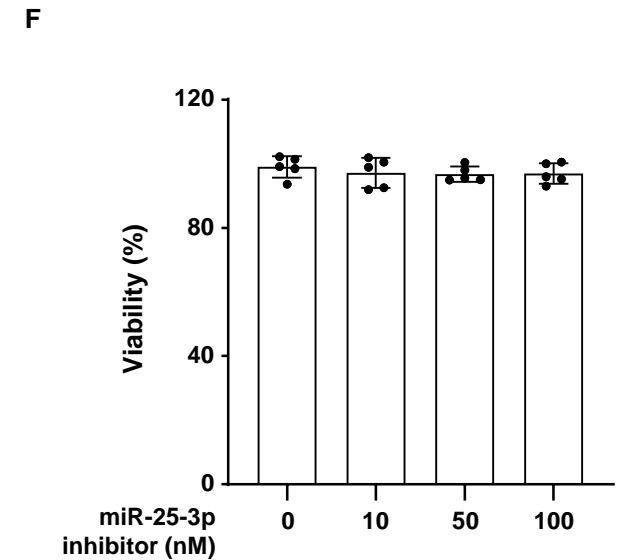

A

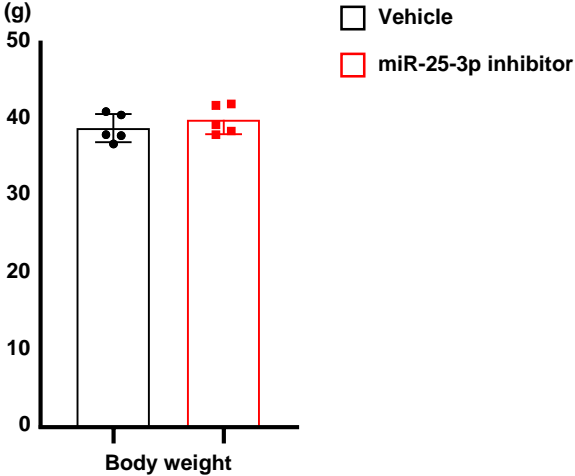

B

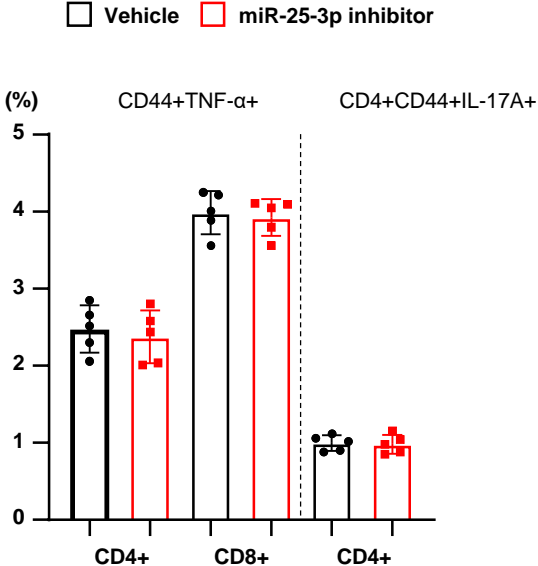

Supplement: DataSheet_1.pdf [file DataSheet_1.pdf]
